# Supplementary material
Source: PubMed Central journal article supplement (PMC2538380)
Supplement: NIHMS61333-supplement-si20060803_104.pdf [file NIHMS61333-supplement-si20060803_104.pdf]

Supporting Information

**N-phosphonacetyl-L-isoasparagine a Potent and Specific Inhibitor of *E. coli* Aspartate Transcarbamoylase<sup>†</sup>**

Joby Eldo<sup>‡,⊥</sup>, James P. Cardia<sup>‡,⊥</sup>, Elizabeth M. O'Day<sup>‡</sup>, Jiarong Xia<sup>‡</sup>, Hiro Tsurata<sup>§</sup> and Evan R. Kantrowitz<sup>‡,\*</sup>

<sup>‡</sup>*Department of Chemistry, Merkert Chemistry Center, Boston College, Chestnut Hill, Massachusetts 02467-3808*, <sup>§</sup>*Stanford Synchrotron Radiation Laboratory, Stanford Linear Accelerator Center, MS 69, Stanford, California 94309-0210*

Table of Elemental Analysis Data

| Compd.   | Formula                                                                                 | Calculated (%) |      |      | Found (%) |      |      |
|----------|-----------------------------------------------------------------------------------------|----------------|------|------|-----------|------|------|
|          |                                                                                         | C              | H    | N    | C         | H    | N    |
| <b>1</b> | C <sub>6</sub> H <sub>11</sub> N <sub>2</sub> O <sub>7</sub> P·H <sub>2</sub> O·0.3EtOH | 27.72          | 5.22 | 9.80 | 27.57     | 5.11 | 9.65 |
| <b>7</b> | C <sub>17</sub> H <sub>25</sub> N <sub>2</sub> O <sub>7</sub> P                         | 51.00          | 6.29 | 7.00 | 51.21     | 6.37 | 6.90 |
